# Supplementary material for: Enhancing Nursing Students' Critical Thinking and Clinical Reasoning Abilities in Post-Operative Care by Scenario-Based Simulation: A Randomized Controlled Trial
Source: Research Square preprint supplement (doi:10.21203/rs.3.rs-7740598/v1), 2025-11-10
Supplement: Supplementary file 1 [file f77fb03d1dff7c746f15e752.docx]

**Supplementary Materials 1 (Knowledge test questionnaire)**

1. Which is not included in Glasgow Coma Scale (GCS)?

A) Vital Signs

B) Eye opening

C) Speaking

D) Obeys commands

2. Which range of the GCS score indicates a severe condition or coma in a patient?

A) 13-15

B) 9-12

C) 4-10

D) 3-8

3. Which position is most appropriate for a post-operative gastrectomy patient to promote comfort and prevent complications?

A) Prone Position

B) Supine Position

C) Lateral Position (Side-Lying)

D) Semi-Fowler's Position

4. Which of the following correctly lists the normal ranges for the major vital signs in a healthy adult?

A) Pulse: 60-100bpm, Blood Pressure: 50-80/140-150 mmHg

B) Blood Pressure: 100-120/60-80 mmHg, SpO2: 95-100%

C) Temperature: 100-102°F, Respiratory Rate: 12-20breaths/min

D) Temperature: 97.7-99.5°F, SpO2: 84-90%

5. What is the common reason for a rise in temperature after surgery besides infection?

A) Inflammatory Cytokines chemical

B) Anesthesia effects

C) Fluid retention

D) Pain in the surgical site

6. What does the presence of rhonchi indicate during auscultation?

A) Normal breath sounds

B) Presence of fluid in the lungs

C) Airway obstruction by secretions

C) Inflammation of the pleura

7. What does the presence of crackles indicate during auscultation?

A) Normal breath sounds

B) Airway obstruction by secretions

C) Fluid in the alveoli

D) Bronchospasm

8. What does the presence of wheezing indicate during auscultation?

A) Normal breath sounds

B) Airway narrowing due to bronchospasm

C) Accumulation of fluid in the lungs

D) Presence of secretions in the airways

9. How many key areas are typically used for auscultation of the heart?

A) 3 areas

B) 4 areas

C) 5 areas

D) 6 areas

10. A patient has an SpO2 level of 93% and is displaying mild shortness of breath but is alert and oriented. What is the most appropriate initial action regarding oxygen administration for this patient?

A) Administer oxygen via nasal cannula

B) High-flow nasal cannula

C) Intubation

D) Continue to monitor oxygen level

11. What is the most important practice for effective wound care?

A) Using antiseptics on every dressing change

B) Keeping the wound clean and covered

C) Avoiding any moisture around the wound

D) Changing the dressing only when it looks dirty

12. What factor is most critical for promoting effective wound healing after surgery?

A) Adequate nutrition

B) Keeping the wound completely dry at all times

C) Minimizing patient movement

D) Using antibiotic ointment on all wounds

13. Which of the following is not a common sign of wound healing?

A) Reduced redness and warmth around the wound

B) Formation of new tissue (granulation)

C) Development of necrotic tissue

D) Decreased swelling around the wound

14. What is a potential complication that can arise from excessive bleeding after surgery?

A) Hypovolemic shock

B) Delayed wound healing

C) Increased risk of infection

D) Enhanced recovery time

15. How should a healthcare provider assess a patient's pain using the Numeric Rating Scale (NRS)?

A) Ask the patient to describe their pain in detail

B) Instruct the patient to rate their pain on a scale from 0 to 10, where 0 is no pain and 10 is the worst pain imaginable

C) Use facial expressions to gauge the patient's pain level

D) Inquire about the characteristics, location, and duration of the pain along with the rating

16. Which of the following types of medications are used to manage pain after surgery? Select all that apply.

A) Nonsteroidal Anti-Inflammatory Drugs (NSAIDs)

B) Narcotic drugs

C) Antibiotics

D) Corticosteroids

17. A nurse is preparing to administer an IV infusion of Soldem at 80 ml/hour using an IV set with a drop factor of 20 drops/ml; what is the infusion rate in drops per minute?

A) 18 drops/min

B) 27 drops/min

C) 42 drops/min

D) 80 drops/min

18. What complication can occur if an IV infusion is administered too quickly?

A) Fluid overload of the body

B) Decreased heart rate

C) Electrolyte imbalance

D) Increased urine output

19. What is a common reason for decreased urine output following surgery?

A) Decreased fluid intake

B) Third spacing and fluid shifts

C) Stress response and hormonal changes

D) Immediate recovery from anesthesia

20. What is considered the normal range for daily urine output in a healthy adult?

A) Less than 0.5 ml/kg/hour

B) More than 2.5ml/kg/ hours

C) Less than 0.1 ml/kg/hour

D) 1.0 ml/kg/hour

21. What is the recommended timeframe for urinary catheter removal after surgery if no complications are present by CDC guideline?

A) Within 24 hours

B) Within 1 to 3 days

C) Within 4 to 6 days

D) After 7 days

22. Why is early mobilization important after surgery? Select all that apply.

A) It improves respiratory function

B) It prevents paralytic ileus

C) It decreases pain

D) Reduces the risk of deep vein thrombosis (DVT)

23. Which one is correct related to drainage management?

A) Place the drainage bag at the same level of the insertion site

B) Redness of the insertion site is normal

C) The drain is in place

D) Bloody fluid amount 100 ml/h right after the surgery is normal

24. Why is it preferable to administer antibiotics before surgery rather than after?

A) It treats existing infections more effectively

B) It prevents the onset of surgical site infections

C) It reduces the need for postoperative care

D) It ensures faster recovery

25. After gastrointestinal surgery, what is the correct order for a patient to start eating?

A) Start with solid foods

B) Begin with sips of water, clear liquids, full liquids, and solid foods

C) Start with regular diet

D) Start according to patient’s will

**Supplementary Materials 2 (Checklist)**

| Nursing care when visiting the room immediately after returning from the operating room (after 2 hours): | | | |
| --- | --- | --- | --- |
| Observation/check items | | Score | Evaluator comments |
| **Greetings and confirmation of consciousness level** | |  |  |
| Greetings (giving your name), greetings (saying appropriate words), and checking patient level of consciousness  (0 = Missed all, 1= Missed either one, 2 = Did all) | | 0 1 2 |  |
| Confirmation of consciousness level (including postoperative delirium) / confirmation of anesthesia state of awakening  (0 = Did not conformed, 2 = Conformed) | | 0 2 |
| Identity verification using name band (confirm with full name) (Ask Pt to tell the name)  (0 = Did not verified, 2 = Verified) | | 0 2 |
| Students should assess 1) GCS each item, 2) Refer GCS scale level (memorized), and 3) Judge normal or abnormal in this situation | | 0 4 |  |
| **Position** | |  |  |
| Patient at semi-Fowler’s position  (0 = Forget, 1 = Did but not right angle, 2 = Correct angle | | 0 1 2 |  |
| **Breathing and Circulation Assessment** | |  |  |
| Body temperature, blood pressure, pulse, respiratory rate, SpO2  *Is blood pressure measured in the opposite arm of IV line (0 = Did not measured anything, 1= Partially measured or incorrect technique, 2 = Measured all) | | 0 1 2 |  |
| Listening to breathing sounds (left-right difference, atelectasis, breathing sounds/auxiliary noises), checking for dyspnea/chest movement  (0 = Missed, 1= Did not place right places / cannot tell right sound name, 2 = Place and sound measure is correct) | | 0 1 2 |
| Confirmation of peripheral circulation (radial and dorsalis pedis arteries, presence of cold cyanosis in the extremities, cold sweat, and moisture)  (0 = Did not confirmed, 1= Checked either arteries or cyanosis, 2 = Checked both)) | | 0 1 2 |
| Listening to heart sounds (listening site, listening on diaphragm side and bell side, heart sounds / abnormal heart sounds)  (0 = Missed to take heart sound, 1= Did but put right places /cannot tell right sound name, 2 = Place and sound measure is correct) | | 0 1 2 |
| (Respiratory) Students should 1) Explain what they assessed (Rate, pattern and sound), 2) Refer those data to evidence (memorized), and 3) Judge normal or abnormal in this situation. Can explain what the sound means | | 0 4 |  |
| (Circulation) Students should 1) Explain what they assessed (Pulse, BP, peripheral circulation and hear sound), 2) Refer those data to evidence (memorized), and 4) Judge normal or abnormal in this situation. Can explain what the heart sound means | | 0 4 |  |
| **Wound and pain assessment** | |  |  |
| Observation of wounds (checking for bleeding, swelling, warmth, redness, determining normal and abnormal)  (0 = Did not checked the wound, 2 = Checked the wound perfectly) | | 0 2 |  |
| Monitoring pain (using pain scales)  (0 = Did not use the scale, 1 = Did not use the pain scale correctly (do not have to use a ruler and ask the patient to rate the steps orally ok) / did not assist / educate the patient on pain correctly, 2 = Assessed the patient's pain correctly using the pain scale, and if the pain was severe, taught the patient how to use a bolus or how to hold the wound.) | | 0 1 2 |  |
| (Wound and surgical site) Students should 1) Explain what they assessed (bleeding, swelling, warmth, redness), 2) Refer those data to evidence (memorized), and 3) Judge normal or abnormal in this situation. Can explain what it means. | | 0 4 |  |
| (Pain) Students should 1) explain how to rate the scale, 2) Refer the level to the NRS (memorized), and 3) Judge "need to take an action (pain killer) or not". | | 0 4 |  |
| **Gastrointestinal assessment** | |  |  |
| Check for abdominal bloating and nausea  (0 = Did not checked, 2 = Checked) | | 0 2 |  |
| Confirmation of intestinal peristalsis sounds (0 = Missed to take intestinal sound, 1= Did but not putting right places / cannot tell right sound name, 2 = Place and sound measure is correct) | | 0 1 2 |  |
| (Abdominal) Students should 1) explain what they assessed (bowel sound, expansion of abdomen), 2) Refer those data to evidence (memorized), and 3) Judge normal or abnormal in this situation. Can explain what it means. | | 0 4 |  |
| **In-Out assessment** | |  |  |
| Checking the drip bottle (IV), occlusion of tube. Check the order sheet and confirm right medication and right speed  (0 = Did not checked the order sheet. 1 = Partially missed 2 = Checked the line and check order sheet and right drug and speed) | | 0 1 2 |  |
| Student needs to explain the dripping speed.  (0 = If just memorized without calculation, 1 = Calculated but wrong, 2 = Calculated right drip). | | 0 1 2 |  |
| Check the antibacterial agent through the side tube (already connected), check the name of drug by the order sheet.  (0 = Memorized without calculation, 1 = Calculated but wrong,  2 = Calculated right drip) | | 0 1 2 |  |
| Check catheters (properly placed and free of line obstructions or bends)  Epidural catheter, peripheral line, J-back drain, indwelling bladder catheter, oxygen tube, foot pump (0 = Missed all, 1 = Partially missed, 2 = Checked all) | | 0 1 2 |  |
| Observation of urine output (confirmation of insertion site and fixation, judgment of normal and abnormal (maintaining 1ml/body weight/h)  (0 = Did not observed the urine, 1 = Observed urine but not evaluate urine amount per hour is sufficient, 2 = Evaluated all) | | 0 1 2 |  |
| Observation of drain (confirmation of insertion site and fixation, judgment of normal and abnormal)  (0= Did not observed the drain, 1 = Partially missed, 2 = Observed characteristics and amount) | | 0 1 2 |  |
| Observation of elastic stockings (Identification of possible blood clots)  (0 = Did not checked, 2 = Checked) | | 0 2 |  |
| Students need to explain "In-Out balance" (Students may say "3rd space loss" and "trans-epidermal water loss；TEWL）" and judge it is acceptable or not by evidence | | 0 4 |  |
| **Environmental arrangement and Patient education** | |  |  |
| Students critically assess and judge the safe environment (installation of bed fences, checking for wrinkles and dampness of sheets, removal of unnecessary items, urine bag and drainage bag are not touching on the floor, etc.)  (0 = Did not noticed 1 = Partially performed 2 = Performed all) | | 0 4 |  |
| Place the nurse call in a location that is easy for patients to use and call out to them before leaving the room.  (0 = Missed about the nurse call 1= Placed the nurse call but did not explain how to use it. 2 = Did both) | | 0 1 2 |  |
| Instruct not to eat or drink until Dr. permits (it is usually the 5th day of post-surgery)  (0= Did not instruct, 2=Instructed) | | 0 2 |  |
| Inform that he has no restriction on the bed  (0 = Did not informed, 2= Did not informed) | | 0 2 |  |
| Inform to use the PCA pump bolus if he has pain.  (0 = Forget about the PCA, 1= Informed about the PCA but did not explain how to use it. 2 = Did both) | | 0 1 2 |  |
| Instruct to keep their oxygen masks until the next morning. | | 0 2 |  |
| **Integration and reporting (I-SBAR) --Clinical reasoning** | |  |  |
| Reporting | |  |  |
| Introduction | Who you are: State your name and role (e.g., nurse name). Patient identification: Include the patient's name, age, and location (e.g. Ward, Patient bed and name) |  |  |
| Situation | Brief description of the problem: Provide a concise explanation of why you’re calling or what the main issue is. (what things patient is getting now like the medication, additional care like suction, dressing, oxygen etc.) | 0 5 |  |
| Background | Relevant medical history: Briefly outline the patient’s medical history that is related to the current situation. (What are the changes of the pt condition and treatment contrast to previous data that is co related with patients) | 0 5 |  |
| Assessment | Vital signs and symptoms: Mention the key clinical findings (e.g., respiratory rate, heart rate, blood pressure, and other relevant observations). Your interpretation from the assessment what you think the problem might be. | 0 5 |  |
| Recommendation | Your suggestion: State what you think should happen next or what action you are requesting. Level of urgency: Indicate how quickly the action should be taken. | 0 5 |  |
| Total | | 100 |  |
| Green color indicates critical Thinking where 0 = Insufficient and 4 = Sufficient  Orange Color indicates Clinical Reasoning where 0 = Poor and 5 = Good | | | |
